# Supplementary material for: Dynamic Regulation of miRNA Expression by Functionally Enhanced Placental Mesenchymal Stem Cells PromotesHepatic Regeneration in a Rat Model with Bile Duct Ligation
Source: PubMed Central journal article supplement (PMC6862171; doi:10.3390/ijms20215299), 2019-10-24
Supplement: ijms-20-05299-s001.pdf [file ijms-20-05299-s001.pdf]

## Supplementary

**Table S1.** Primer sequences for human using quantitative real time polymerase chain reaction.

| Gene  | Accession Number | Sequence                                                           | Tm (°C) |
|-------|------------------|--------------------------------------------------------------------|---------|
| HIF1A | NM_001530.4      | F: 5'-GTTTACTAAAGGACAAGTCA-3'<br>R: 5'-TTCTGTTTGTGAAGGGAG-3'       | 60      |
| VEGF  | NM_001204384.1   | F: 5'-GCCTTGCCTTGCTGCTCTAC-3'<br>R: 5'-ACATCCATGAACTTCACCACTTCG-3' | 60      |
| PRL-1 | NM_003463.4      | F: 5'-TACTGCTCCACCAAGAAGCC-3'<br>R: 5'-AGGTTTACCCCATCCAGGTC-3'     | 60      |
| ITGA4 | NM_000885.6      | F: 5'-TTCCTACGGGCTGTGTTC-3'<br>R: 5'-CTGAAGTTTGCCAGTTTGG-3'        | 55      |
| ITGB7 | NM_000889.3      | F: 5'-AGCAGCAACAACCTCAACTGG-3'<br>R: 5'-TTACAGACCCACCCTTCCTCT-3'   | 55      |
| RHOA  | NM_001664.4      | F: 5'-TGGAAAGCAGGTAGAGTTGG-3'<br>R: 5'-GACTTCTGGGGTCCACTTTT-3'     | 55      |
| ROCK1 | NM_005406.3      | F: 5'-GAAGAAAGAGAAGCTCGAGA-3'<br>R: 5'-GATCTTGTAGTCTCCGCATCTGT-3'  | 55      |
| GAPDH | NM_002046.7      | F: 5'-GCACCGTCAAGGCTGAGAAC-3'<br>R: 5'-GTGGTGAAGACGCCAGTGGA-3'     | 60      |

**Table S2.** Primer sequences for rat using quantitative real time polymerase chain reaction.

| Gene   | Accession Number | Sequence                                                         | Tm (°C) |
|--------|------------------|------------------------------------------------------------------|---------|
| ITGA4  | NM_001107737.1   | F: 5'-GGAAGCCCCAGTGGAGAAC-3'<br>R: 5'-ATTGTCACTCCCAGCCACTGA-3'   | 55      |
| ITGA6  | NM_053725.1      | F: 5'-AGCCCCAGGGACTTACAAC-3'<br>R: 5'-CTTCATAGGGCCCATCTTCA-3'    | 55      |
| ITGB1  | NM_017022.2      | F: 5'-AACAGTGAAGACATGGATGC-3'<br>R: 5'-CTCTCTCTTCTGCACACAC-3'    | 55      |
| ITGB7  | NM_013171.1      | F: 5'-AGTGCCCTCCAAGCTTAACCAC-3'<br>R: 5'-CGTCCACCTCTCTCTCGAA-3'  | 55      |
| ENG    | NM_001010968.2   | F: 5'-AAGGTGTGACTGGACACAAG-3'<br>R: 5'-CCAGATCTGCATATTGTGGT-3'   | 60      |
| PDGFRA | NM_012802.1      | F: 5'-GAGGACGATTCTGCCATCAT-3'<br>R: 5'-CAGTTCTGACGTGGCTTCA-3'    | 60      |
| PDGFRB | NM_031525.1      | F: 5'-TGTTTCGTGCTATTGCTCCTG-3'<br>R: 5'-TGTCAGCACACTGGAGAAGG-3'  | 60      |
| IL-6R  | NM_017020.3      | F: 5'-CCTTGTAATGCCTTTGTG-3'<br>R: 5'-GTACACTTTGTACCCTCCA-3'      | 60      |
| HNF1A  | NM_012669.1      | F: 5'-AAGATGACACGGATGACGATGG-3'<br>R: 5'-GGTTGAGACCCGTAGTGTCC-3' | 60      |
| HNF4A  | NM_022180.2      | F: 5'-AAATGTGCAGGTGTTGACCA-3'<br>R: 5'-CACGCTCCTCCTGAAGAATC-3'   | 60      |
| GAPDH  | NM_017008.4      | F: 5'-TCCCTCAAGATTGTCAGCAA-3'<br>R: 5'-AGATCCACAACGGATACATT-3'   | 60      |

**Table S3.** miRNA sequence and target gene in 3'-UTR site.

| <b>miRNA Target Gene</b>           | <b>Accession Number</b>                    | <b>Target Sequence</b>                                                                       |
|------------------------------------|--------------------------------------------|----------------------------------------------------------------------------------------------|
| hsa-miR-30a-5p<br>hPRL-1<br>hITGA4 | MIMAT0000087<br>NM_003463.4<br>NM_000885.6 | 3'-GAAGGUCAGCUCCUACAAAUGU-5'<br>5'-GCCUGCUCACUUUAUGUUUACA-3'<br>5'-AAUUUAAAAGACACUGUUUACA-3' |
| hsa-miR-340-5p<br>hITGA4           | MIMAT0004692<br>NM_000885.6                | 3'-UUAGUCAGAGUAACGAAAUAUU-5'<br>5'-CUUAAAAGCCUUUAUUUAUAA-3'                                  |
| hsa-miR-146a-3p<br>hITGB7          | MIMAT0004608<br>NM_000889.3                | 3'-GACUUCUUGACUAAAAGUCUCC-5'<br>5'-CACCCUACUUCAUUUUCAGAGU-3'                                 |
| rno-miR-340-5p<br>rITGB1           | MIMAT0004650<br>NM_017022.2                | 3'-UUAGUCAGAGUAACGAAAUAUU-5'<br>5'-UCCCAACGCCUUCUCUUUAUAA-3'                                 |
| rno-miR-30a-5p<br>rITGA6           | MIMAT0000808<br>NM_053725.1                | 3'-GAAGGUCAGCUCCUACAAAUGU-5'<br>5'-UACAAAUGAUGCCUUGUUUACA-3'                                 |
| rno-miR-27a-3p<br>rPDGFRA          | MIMAT0000799<br>NM_012802.1                | 3'-CGCCUUGAAUCGGUGACACUU-5'<br>5'-GUCUUGGGAAGCCUCUGUGAA-3'                                   |
| rno-miR-21-5p<br>rIL-6R            | MIMAT0000790<br>NM_017020.3                | 3'-AGUUGUAGUCAGACUAUUCGAU-5'<br>5'-CCUUUUGACUUUUUAUAAGCUA-3'                                 |
| rno-miR-122-5p<br>rHNF1A           | MIMAT0000827<br>NM_001530.4                | 3'-GUUUGUGGUAACAGUGUGAGGU-5'<br>5'-CCUGUGCCUCCCAGGCCACUCCA-3'                                |
